# Supplementary material
Source: PubMed Central journal article supplement (PMC2849965)

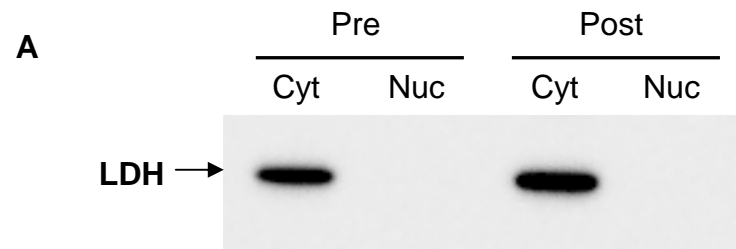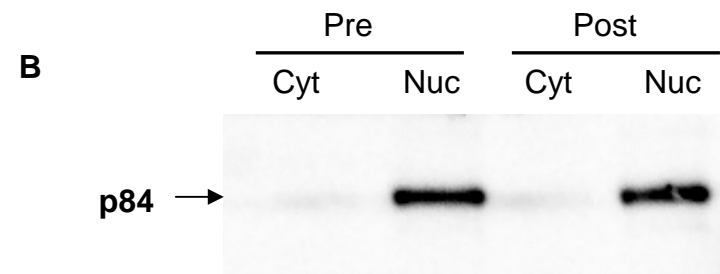

Supplement: tjp0588-1011-SD1.pdf [file tjp0588-1011-SD1.pdf]

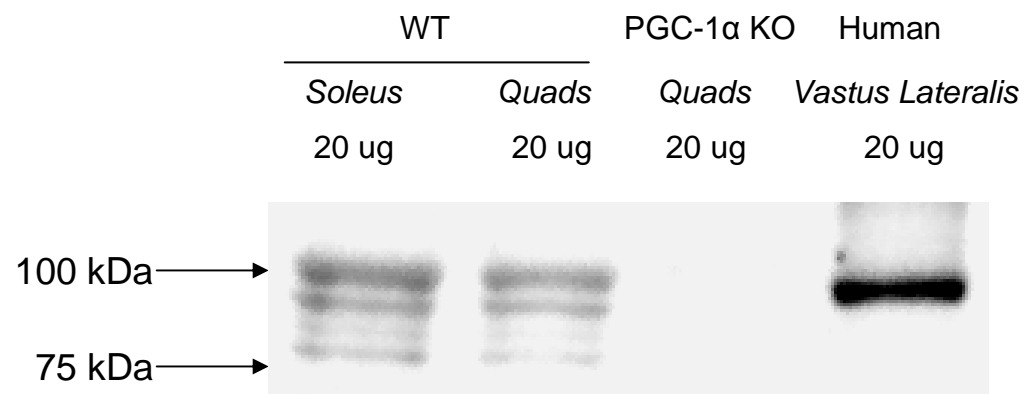

Supplement: tjp0588-1011-SD2.pdf [file tjp0588-1011-SD2.pdf]
